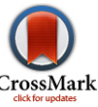

# The Prevalence of Primary Angle Closure Glaucoma in Adult Asians: A Systematic Review and Meta-Analysis

Jin-Wei Cheng<sup>1\*</sup>, Ying Zong<sup>2\*</sup>, You-Yan Zeng<sup>3\*</sup>, Rui-Li Wei<sup>1\*</sup>

**1** Department of Ophthalmology, Shanghai Changzheng Hospital, Second Military Medical University, Shanghai, China, **2** Department of Health Toxicology, Second Military Medical University, Shanghai, China, **3** School of Nursing, Second Military Medical University, Shanghai, China

## Abstract

**Background:** Primary angle closure glaucoma (PACG) is higher in Asians than Europeans and Africans, with over 80% of PACG worldwide in Asia. Previous estimates of PACG were based largely on early studies, mostly using inappropriate case definitions. Therefore, we did a systematic review and meta-analysis to estimate the prevalence of PACG in adult Asian populations and to quantify its association with age, gender, and region.

**Methods:** All primary reports of population-based studies that reported the prevalence of PACG in adult Asian populations were identified. PACG case definition was compatible with the ISGEO definition. Twenty-nine population-based studies were included. The overall pooled prevalence estimates were calculated using a random effect model, and ethnicity-, age- and gender-specific pooled prevalence estimates were also calculated.

**Results:** The overall pooled prevalence of PACG in those of adult Asians was 0.75% (95% CI, 0.58, 0.96). Ethnicity-specific pooled prevalence estimates were 0.97% (0.22, 4.27) in Middle East group, 0.66% (0.23, 1.86) in South East Asia group, 0.46% (0.32, 0.64) in India group, 1.10% (0.85, 1.44) in China group, and 1.19% (0.35, 3.98) in Japan group, respectively. Age-specific prevalence was 0.21% (0.12, 0.37) for those 40–49 years, 0.54% (0.34, 0.85) for those 50–59 years, 1.26% (0.93, 1.71) for those 60–69 years, and 2.32% (1.74, 3.08) for those 70 years or above. The overall female to male ratio of the PACG prevalence was 1.51:1 (95% CI 1.01, 2.28).

**Conclusions:** PACG affects approximately 0.75% adult Asians, increasing double per decade, and 60% of cases being female. The prevalence rates vary greatly by ethnic region.

**Citation:** Cheng J-W, Zong Y, Zeng Y-Y, Wei R-L (2014) The Prevalence of Primary Angle Closure Glaucoma in Adult Asians: A Systematic Review and Meta-Analysis. PLoS ONE 9(7): e103222. doi:10.1371/journal.pone.0103222

**Editor:** Ted S. Acott, Casey Eye Institute, United States of America

**Received:** April 26, 2014; **Accepted:** June 25, 2014; **Published:** July 24, 2014

**Copyright:** © 2014 Cheng et al. This is an open-access article distributed under the terms of the Creative Commons Attribution License, which permits unrestricted use, distribution, and reproduction in any medium, provided the original author and source are credited.

**Data Availability:** The authors confirm that all data underlying the findings are fully available without restriction. All relevant data are within the paper and its Supporting Information files.

**Funding:** This work was supported by Shanghai Rising-Star Program (Grant No. 12QA1404600), Shanghai Municipal Natural Science Foundation (Grant No. 10ZR1439300), and National Natural Science Foundation of China (Grant No. 81000374 and 81170874). The funders had no role in study design, data collection and analysis, decision to publish, or preparation of the manuscript.

**Competing Interests:** The authors have declared that no competing interests exist.

\* Email: jinnwave@163.com (JWC); ruliwei@126.com (RLW)

These authors contributed equally to this work.

## Introduction

Glaucoma is considered as the leading cause of irreversible blindness worldwide, with Asians accounting for approximately half of the world's glaucoma cases [1]. It also has been accepted that primary angle closure glaucoma (PACG) is higher in Asians than Europeans and Africans, with over 80% of those with PACG in Asia [1,2]. Because PACG appears to cause blindness more frequently than primary open angle glaucoma (POAG), it is an important public health issue.

The current understanding of PACG in Asian populations is based largely on previous studies [1–3]. Early studies using the definitions of glaucoma based on intraocular pressure (IOP) reported that the prevalence of PACG in adults was 0.34% in Japan [4], 1.49% in Mongolia [5], 1.37% in China [6], and 1.18% in India [7], respectively. However, the earlier definitions of glaucoma are no longer accepted [8], and the prevalence rates

reported in these earlier studies may not be accurate and comparable [9].

The International Society of Geographical & Epidemiological Ophthalmology (ISGEO) definition has demonstrated the general accepted classification for the diagnosis of glaucoma in population-based prevalence surveys [8]. However, the current understanding of PACG in Asians is based largely on studies using the earlier definitions of glaucoma, but not the ISGEO definition, which increasingly was seen as inadequate for both clinical and research purposes [1,2,9]. Recently, many population-based surveys of glaucoma in Asians using the ISGEO definition have been conducted. Because of the uncertainty surrounding the prevalence of PACG, this systematic review was to summarize the available population-based studies reporting prevalence values in Asians, to estimate an overall prevalence of PACG consistent with the ISGEO definition requiring structural and/or functional evidence of glaucomatous optic neuropathy.

## Materials and Methods

This meta-analysis was performed according to a predetermined protocol, and the methods used conformed to the Meta-analysis of Observational Studies in Epidemiology and the relevant aspects of the PRISMA statement [10,11].

### Search Strategy

We used three methods to identify publications that reported the prevalence of PACG among Asian populations. First, we conducted a systematic search of the PubMed and EMBASE electronic databases from each database's inception date to February 10, 2014. Broad MeSH terms and keywords were used combining terms related to epidemiology (including MeSH search using *exp prevalence\**, and *exp epidemiology\**, and keyword search using words *prevalence*, *epidemiology*, and *incidence*), terms related to disease (including MeSH search using *exp glaucoma\**, and keyword search using words *glaucoma*), and terms related to population (including MeSH search using *exp Asia\**, and keyword search using words *Asia*, and *Asian*). Second, we hand-searched the reference lists of the relevant reviews, such as *Rudnicka 2006* [12], *Quigley 2006* [1], *Wong 2006* [2], *Zhou 2007* [3], and *Cheng 2013* [13]. Third, we consulted the reference lists of included articles to find additional studies.

### Study Selection

Published studies were included if they met the following inclusion criteria: (i) population-based, cross-sectional survey studies, with either random or consecutive sampling; (ii) adult Asian populations, customarily aged 40 years and older; (iii) an examination rate of the eligible population sample not less than 50%; (iv) PACG case definitions compatible with the current ISGEO definition based on structural and/or functional evidence of glaucomatous optic neuropathy in the presence of an occludable anterior chamber angle.

To determine study eligibility, three independent researchers screened the titles and abstracts of all search results, and all citations were classified into one of two categories: (i) relevant; (ii) irrelevant. The full articles of relevant citations were retrieved for further review to evaluate whether they met the inclusion criteria or not. Only eligible trials were assessed for methodological quality. Disagreements were resolved by consensus in both phases.

### Data Extraction

The following detailed information was extracted into a customized proforma: (i) study information (study name, publication year, citation, and study type), (ii) basic study data (geographical region, country of survey area, conditions in survey area, data collection year, sample size, and sociodemographic characteristics), (iii) quality-related data and outcome measures data (target population, sampling design, completeness of data/response rate, data collection, prevalence, definition and identification procedures for outcomes). Three reviewers independently carried out the data extraction, and inconsistencies were resolved by discussion with another independent reviewer.

### Risk of Bias Assessment

Two reviewers independently assessed the risk of bias for each included study, using a checklist developed from an existing tool assessing risk of bias in prevalence studies. The tool includes 10 items that assess measurement bias, selection bias, and bias related to the analysis (all rated as either high or low risk) and an overall assessment of risk of bias rated as either low, moderate, or high risk [14,15]. To adapt to the needs of this meta-analysis, we also

modified item 9 as "Were the screening process and assessing methods for the parameter of interest appropriate?" [16,17].

Agreement was measured using kappa value as recommended by the Cochrane Handbook for Systematic Reviews of Interventions [18], and disagreement was resolved finally by discussion. Overall agreement between the reviewers was 93% with a kappa value of 0.76, indicating excellent agreement.

### Statistical Analysis

All statistical analyses were performed using Comprehensive Meta-Analysis software version 2.0 (Biostat, Englewood Cliffs, New Jersey) (<http://www.meta-analysis.com>). The primary outcome for each study was the prevalence proportion, calculated as the ratio of the number of individuals with PACG to the total number of study participants. The  $I^2$  statistic was used to determine heterogeneity across studies, which quantify heterogeneity irrespective of the number of studies [19,20]. The estimate and its 95% confidence intervals (CI) of overall proportion was calculated using the random effects model where heterogeneity was found [21], otherwise, the fixed effects model was used [22].

Ethnicity-specific pooled prevalence estimates of PACG were calculated, using a random effect model, which included the dominant ethnic group of five regions in Asia: Middle East, South East Asia, India, China, and Japan [1]. Age- and gender-specific pooled prevalence estimates of PACG were also calculated. A random-effect meta-regression model was built with ethnicity, age, and gender.

In addition, to attempt to control for potential methodologic heterogeneity, a random-effect regression model was also used to evaluate sources of variability in the overall pooled-prevalence estimate, such as urbanicity, the definition of occludable angle and the individual risk-of-bias items.

## Results

### Study Characteristics

**Figure 1** shows the flow chart of the selection process used to identify relevant studies. We reviewed the full text of 117 articles from 1997 studies identified from the literature search, and 88 articles were excluded (**Appendix S1**). Twenty-nine population studies met all the inclusion criteria and were used to calculate the best evidence PACG prevalence estimates in adult Asian populations (**Table 1**) [23–51]. Seven studies (24%) were conducted in China, 5 (17%) in India, 3 (10%) in Singapore, 2 (7%) in Japan, Korea, and Nepal, and 1 (3%) in Bangladesh, Iran, Mongolia, Myanmar, Oman, Qatar, Thailand, and Sri Lanka. Fifteen studies (52%) were undertaken in rural, 6 (21%) in urban, and 8 (28%) in mixed populations. The age ranges of the studied populations were 30 years and over, with the majority of studies ( $n = 20$ , 69%) being 40 years and over, and the male portion of the populations ranged from 36% to 64%. Twenty-five studies (86%) used ISGEO definition for the diagnosis of PACG.

### Risk of Bias

Overall, 22 studies (76%) were rated as having a low risk of bias, 7 (24%) were rated as having a moderate risk of bias (**Table 2**). High risk-of-bias ratings were most common for item I (national representativeness/target population), item IV (non-response bias), item VI (case definition), and item VII (study instrument).

### Meta-Analysis

The prevalence of PACG reported in the included studies varied from 0.13% to 2.50% in adult Asian populations (**Figure 2**). The heterogeneity in the prevalence of PACG was

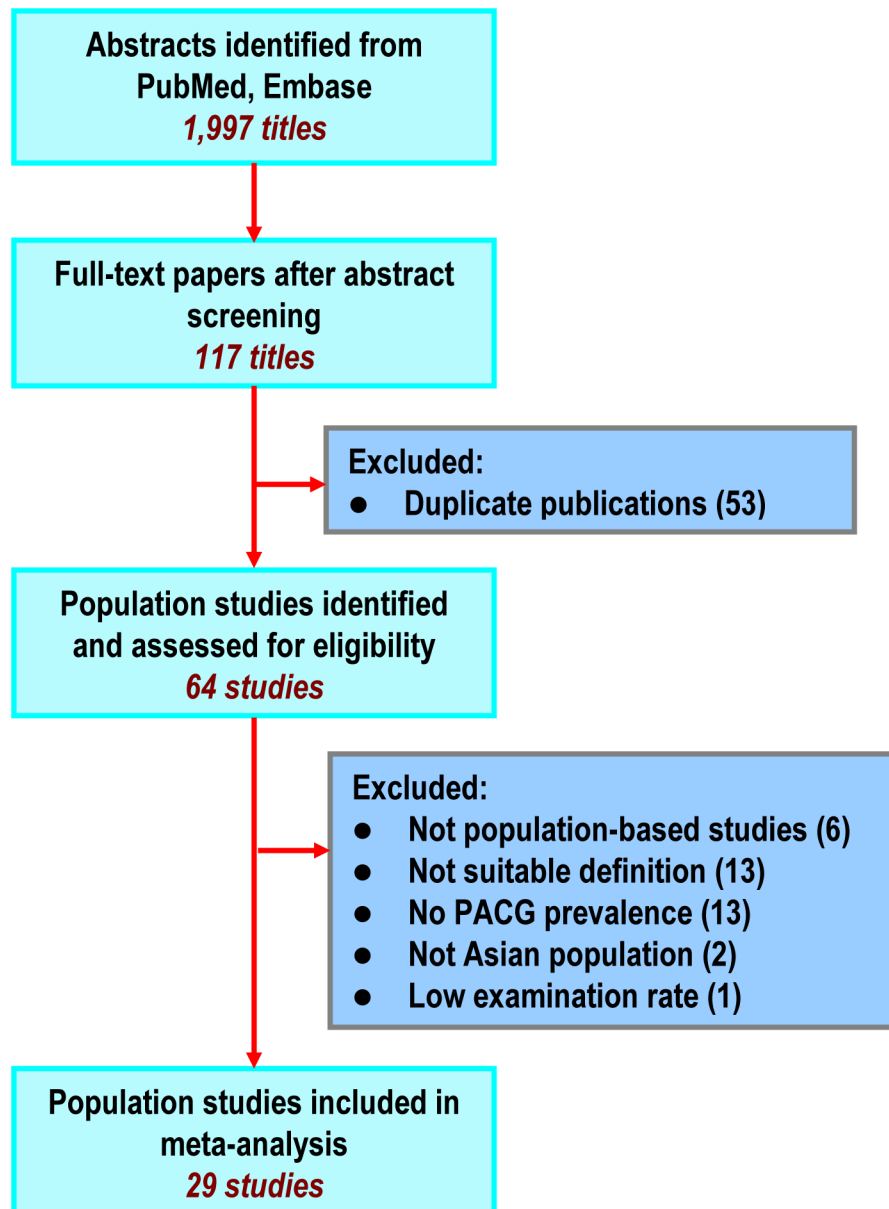

**Figure 1. Flow Diagram of Study Selection.** PACG: primary angle closure glaucoma  
doi:10.1371/journal.pone.0103222.g001

statistically significant and substantial in considerable. The overall random-effects estimate of the prevalence of PACG in adult Asian populations was 0.75% (95% CI, 0.58, 0.96).

Ethnicity-specific pooled prevalence estimates of PACG of five Asian regions are shown in Figure 3. The pooled prevalence estimates of PACG were 0.97% (95% CI, 0.22, 4.27) in Middle East group, 0.66% (0.23, 1.86) in South East Asia group, 0.46% (0.32, 0.64) in India group, 1.10% (0.85, 1.44) in China group, and 1.19% (0.35, 3.98) in Japan group, respectively. The meta-regression analyses showed there was a strong association of prevalence with ethnic group ( $\beta = 0.27$ ,  $P = 0.009$ ).

Fifteen studies reported age-specific prevalence of PACG, and twenty-two studies reported gender-specific prevalence. The age-specific prevalence was 0.21% (95% CI, 0.12, 0.37) for those 40–49 years old, 0.54% (0.34, 0.85) for those 50–59 years old, 1.26%

(0.93, 1.71) for those 60–69 years old, and 2.32% (1.74, 3.08) for those 70 years old or above (Figure 3). Meta-regression analysis showed a high prevalence rate was strongly associated with an older age of sample ( $\beta = 0.74$ ,  $P < 0.0001$ ). The pooled prevalence was 0.63% (0.49, 0.82) for male and 0.91% (0.68, 1.21) for female (Figure 3). Meta-regression analyses showed a strong association between a high prevalence rate and a higher proportion of female gender ( $\beta = 0.41$ ,  $P = 0.047$ ), and the overall female to male ratio of the PACG prevalence was 1.51:1 (95% CI 1.01, 2.28).

The meta-regression analyses showed there was no association of the prevalence rate with urbanicity ( $\beta = -0.17$ ,  $P = 0.524$ ). The prevalence of PACG was also not associated with the definition of occludable angle ( $\beta = -0.05$ ,  $P = 0.717$ ). For risk-of-bias items, the prevalence rate was not associated with a high risk of bias for item

**Table 1.** Population Characteristics of the Studies Reported the Prevalence of Primary Angle Closure Glaucoma in Asians.

| Study                                 | Country    | Urbanicity   | Examined Year | Response (%) | Age Range (yrs) | N    | Sex Ratio (M/F) | Case Definition        | Angle Examination | Occludable Angle Definition | Adult PACG n (%) |
|---------------------------------------|------------|--------------|---------------|--------------|-----------------|------|-----------------|------------------------|-------------------|-----------------------------|------------------|
| Aravind Comprehensive Eye Survey [23] | India      | Rural        | 1995–1997     | 93.0         | ≥40             | 5150 | 2836/2314       | Angle + (GON ± GVFD)   | Gonioscopy        | Shaffer grade 0             | 26 (0.50)        |
| Mongolia Eye Study [24]               | Mongolia   | Rural, urban | 1995, 1997    | 95.4         | ≥40             | 1717 | 1007/710        | ISGEO                  | Gonioscopy        | 270° ITM                    | 28 (1.63)        |
| Tanjong Pagar Eye Study [25]          | Singapore  | Urban        | 1997–1998     | 71.8         | 40–79           | 1232 | 557/670         | ISGEO                  | Gonioscopy        | 270° ITM                    | 14 (1.14)        |
| Rom Klao Eye Study [26]               | Thailand   | Urban        | 1999          | 88.7         | ≥50             | 701  | 249/452         | ISGEO                  | Gonioscopy        | 270° ITM                    | 6 (0.86)         |
| Dhaka Eye Study [27]                  | Bangladesh | Rural        | 1997–1998     | 65.9         | ≥35             | 2347 | 1120/1127       | ISGEO                  | Gonioscopy        | 240° ITM                    | 7 (0.30)         |
| Tajimi Study [28]                     | Japan      | Urban        | 2000–2001     | 78.1         | ≥40             | 3021 | 1334/1687       | ISGEO                  | Gonioscopy        | 270° ITM                    | 19 (0.63)        |
| Shaanxi Rural Study [29]              | China      | Rural        | 2003          | 81.0         | ≥40             | 2835 | 1246/1587       | Angle+IOP+(GVFD+/-GON) | Gonioscopy        | Shaffer grade 0             | 31 (1.09)        |
| West Bengal Glaucoma Study [30]       | India      | Rural        | 1998–1999     | 83.1         | ≥50             | 1324 | 611/658         | ISGEO                  | Gonioscopy        | 240° ITM                    | 3 (0.24)         |
| Chennai Glaucoma Study [31]           | India      | Rural        | 2001–2004     | 80.2         | ≥40             | 3850 | 1710/2140       | ISGEO                  | Gonioscopy        | 180° ITM                    | 34 (0.88)        |
| Liwan Eye Study [32]                  | China      | Urban        | 2003–2004     | 75.3         | ≥50             | 1405 | 613/792         | ISGEO                  | Gonioscopy        | 270° ITM                    | 21 (1.53)        |
| Meiktila Eye Study [33]               | Myanmar    | Rural        | 2005          | 83.7         | ≥40             | 2076 | 836/1240        | ISGEO                  | Gonioscopy        | 270° ITM                    | 52 (2.50)        |
| Oman Eye Study [34]                   | Oman       | Rural, urban | 2005–2006     | 79.5         | ≥30             | 3324 | 1289/2035       | Angle + (GON ± GVFD)   | Gonioscopy        | Shaffer grade 2             | 68 (2.05)        |
| Singapore Malay Eye Study [35]        | Singapore  | Urban        | 2004–2006     | 78.7         | ≥40             | 3280 | 1576/1704       | ISGEO                  | Gonioscopy        | 180° ITM                    | 8 (0.24)         |
| Kandy Eye Study [36]                  | Sri Lanka  | Rural        | 2006–2007     | 79.9         | ≥40             | 1351 | 539/812         | ISGEO                  | Gonioscopy        | 270° ITM                    | 7 (0.57)         |
| Sunsari Eye Study [37]                | Nepal      | Rural        | 2003–2004     | 80.0         | ≥40             | 1600 | 789/811         | Angle+IOP+(GVFD+/-GON) | Gonioscopy        | Shaffer grade 0             | 2 (0.13)         |
| Andhra Pradesh Eye Disease Study [38] | India      | Rural, urban | 1996–2000     | 87.3         | ≥40             | 3724 | 1751/1973       | ISGEO                  | Gonioscopy        | 180° ITM                    | 35 (0.94)        |
| Beijing Eye Study [39]                | China      | Rural, urban | 2001          | 83.4         | ≥40             | 4315 | 1889/2412       | ISGEO                  | Gonioscopy        | 270° ITM                    | 44 (1.02)        |
| Bin Eye Study [40]                    | China      | Rural        | 2000          | 80.0         | ≥40             | 4956 | 2228/2728       | ISGEO                  | Gonioscopy        | 270° ITM                    | 78 (1.57)        |
| Handan Eye Study [41]                 | China      | Rural        | 2007          | 90.4         | ≥40             | 5480 | 2557/2923       | ISGEO                  | Gonioscopy        | 180° ITM                    | 30 (0.55)        |

Table 1. Cont.

| Study                                    | Country   | Urbanicity   | Examined Year | Response (%) | Age Range (yrs) | N    | Sex Ratio (M/F) | Case Definition | Angle Examination | Occludable Angle Definition | Adult PACG n (%) |
|------------------------------------------|-----------|--------------|---------------|--------------|-----------------|------|-----------------|-----------------|-------------------|-----------------------------|------------------|
| Kailu Eye Study [42]                     | China     | Rural        | 2009          | 87.4         | ≥40             | 5158 | 2299/2859       | ISGEO           | Gonioscopy        | 270° ITM                    | 90 (1.74)        |
| Sangju Eye Study [43]                    | Korea     | Rural        | -             | 60.0         | ≥50             | 671  | 264/407         | ISGEO           | Gonioscopy        | 270° ITM                    | 2 (0.30)         |
| Qatar Eye Study [44]                     | Qatar     | Rural, urban | 2009          | 97.7         | ≥40             | 3149 | 2015/1134       | ISGEO           | Gonioscopy        | 270° ITM                    | 14 (0.44)        |
| Namil Study [45]                         | Korea     | Rural        | 2007–2008     | 79.5         | ≥40             | 1426 | 625/801         | ISGEO           | Gonioscopy        | 270° ITM                    | 10 (0.70)        |
| Bhaktapur Glaucoma Study [46]            | Nepal     | Rural, urban | 2007–2009     | 83.4         | ≥40             | 3991 | 1819/2172       | ISGEO           | Gonioscopy        | 270° ITC                    | 17 (0.43)        |
| Kumejima Study [47]                      | Japan     | Rural        | 2005–2006     | 81.2         | ≥40             | 3762 | 1833/1929       | ISGEO           | Gonioscopy        | 270° ITM                    | 82 (2.18)        |
| Yunnan Minority Eye Study [48]           | China     | Rural        | 2010          | 77.8         | ≥50             | 2133 | 769/1364        | ISGEO           | Gonioscopy        | 270° ITM                    | 20 (0.94)        |
| Central India Eye and Medical Study [49] | India     | Rural        | 2006–2008     | 80.1         | ≥30             | 4711 | 2191/2520       | ISGEO           | Gonioscopy        | 270° ITM                    | 14 (0.30)        |
| Singapore Indian Eye Study [50]          | Singapore | Urban        | 2007–2009     | 75.6         | ≥40             | 3400 | 1706/1694       | ISGEO           | Gonioscopy        | 180° ITM                    | 6 (0.18)         |
| Yazd Eye Study [51]                      | Iran      | Rural, urban | 2010–2011     | 90.4         | ≥40             | 1990 | 922/1068        | ISGEO           | Gonioscopy        | 270° ITM                    | 7 (0.33)         |

GON: glaucomatous optic neuropathy; GVFD: glaucomatous visual field defect; IOP: intraocular pressure; ISGEO: International Society of Geographical & Epidemiological Ophthalmology.

ITM: invisible trabecular meshwork; ITC: iridotrabecular contact.

PACG: primary angle closure glaucoma.

doi:10.1371/journal.pone.0103222.t001

**Table 2. Risk of Bias of the Studies Reported the Prevalence of Primary Angle Closure Glaucoma in Asians.**

| Study                                    | I                                                                                                                                                  | II  | III | IV   | V   | VI   | VII  | VIII | IX  | X   | Overall  |
|------------------------------------------|----------------------------------------------------------------------------------------------------------------------------------------------------|-----|-----|------|-----|------|------|------|-----|-----|----------|
| Aravind Comprehensive Eye Survey [23]    | High                                                                                                                                               | Low | Low | Low  | Low | High | Low  | Low  | Low | Low | Moderate |
| Mongolia Eye Study [24]                  | High                                                                                                                                               | Low | Low | Low  | Low | Low  | Low  | Low  | Low | Low | Low      |
| Tanjong Pagar Eye Study [25]             | High                                                                                                                                               | Low | Low | High | Low | Low  | Low  | Low  | Low | Low | Moderate |
| Rom Klao Eye Study [26]                  | High                                                                                                                                               | Low | Low | Low  | Low | Low  | Low  | Low  | Low | Low | Low      |
| Dhaka Eye Study [27]                     | High                                                                                                                                               | Low | Low | High | Low | Low  | Low  | Low  | Low | Low | Moderate |
| Tajimi Study [28]                        | High                                                                                                                                               | Low | Low | Low  | Low | Low  | Low  | Low  | Low | Low | Low      |
| Shaanxi Rural Study [29]                 | High                                                                                                                                               | Low | Low | Low  | Low | High | High | Low  | Low | Low | Moderate |
| West Bengal Glaucoma Study [30]          | High                                                                                                                                               | Low | Low | Low  | Low | Low  | Low  | Low  | Low | Low | Low      |
| Chennai Glaucoma Study [31]              | High                                                                                                                                               | Low | Low | Low  | Low | Low  | Low  | Low  | Low | Low | Low      |
| Liwan Eye Study [32]                     | High                                                                                                                                               | Low | Low | Low  | Low | Low  | Low  | Low  | Low | Low | Low      |
| Mieiktla Eye Study [33]                  | High                                                                                                                                               | Low | Low | Low  | Low | Low  | Low  | Low  | Low | Low | Low      |
| Oman Eye Study [34]                      | Low                                                                                                                                                | Low | Low | Low  | Low | High | Low  | Low  | Low | Low | Moderate |
| Singapore Malay Eye Study [35]           | Low                                                                                                                                                | Low | Low | Low  | Low | Low  | Low  | Low  | Low | Low | Low      |
| Kandy Eye Study [36]                     | High                                                                                                                                               | Low | Low | Low  | Low | Low  | Low  | Low  | Low | Low | Low      |
| Sunsari Eye Study [37]                   | High                                                                                                                                               | Low | Low | Low  | Low | High | Low  | Low  | Low | Low | Moderate |
| Andhra Pradesh Eye Disease Study [38]    | High                                                                                                                                               | Low | Low | Low  | Low | Low  | Low  | Low  | Low | Low | Low      |
| Beijing Eye Study [39]                   | High                                                                                                                                               | Low | Low | Low  | Low | Low  | Low  | Low  | Low | Low | Low      |
| Bin Eye Study [40]                       | High                                                                                                                                               | Low | Low | Low  | Low | Low  | Low  | Low  | Low | Low | Low      |
| Handan Eye Study [41]                    | High                                                                                                                                               | Low | Low | Low  | Low | Low  | Low  | Low  | Low | Low | Low      |
| Kailu Eye Study [42]                     | High                                                                                                                                               | Low | Low | Low  | Low | Low  | Low  | Low  | Low | Low | Low      |
| Sangju Eye Study [43]                    | High                                                                                                                                               | Low | Low | High | Low | Low  | Low  | Low  | Low | Low | Moderate |
| Qatar Eye Study [44]                     | Low                                                                                                                                                | Low | Low | Low  | Low | Low  | Low  | Low  | Low | Low | Low      |
| Namil Study [45]                         | High                                                                                                                                               | Low | Low | Low  | Low | Low  | Low  | Low  | Low | Low | Low      |
| Bhaktapur Glaucoma Study [46]            | High                                                                                                                                               | Low | Low | Low  | Low | Low  | Low  | Low  | Low | Low | Low      |
| Kumejima Study [47]                      | High                                                                                                                                               | Low | Low | Low  | Low | Low  | Low  | Low  | Low | Low | Low      |
| Yunnan Minority Eye Study [48]           | High                                                                                                                                               | Low | Low | Low  | Low | Low  | Low  | Low  | Low | Low | Low      |
| Central India Eye and Medical Study [49] | High                                                                                                                                               | Low | Low | Low  | Low | Low  | Low  | Low  | Low | Low | Low      |
| Singapore Indian Eye Study [50]          | Low                                                                                                                                                | Low | Low | Low  | Low | Low  | Low  | Low  | Low | Low | Low      |
| Yazd Eye Study [51]                      | High                                                                                                                                               | Low | Low | Low  | Low | Low  | Low  | Low  | Low | Low | Low      |
| I                                        | Was the study's target population a close representation of the national population in relation to relevant variables, e.g., age, sex, occupation? |     |     |      |     |      |      |      |     |     |          |
| II                                       | Was the sampling frame a true or close representation of the target population?                                                                    |     |     |      |     |      |      |      |     |     |          |
| III                                      | Was some form of random selection used to select the sample, OR, was a census undertaken?                                                          |     |     |      |     |      |      |      |     |     |          |
| IV                                       | Was the likelihood of non-response bias minimal?                                                                                                   |     |     |      |     |      |      |      |     |     |          |

Table 2. Cont.

| Study | I | II | III | IV | V | VI | VII | VIII | IX | X | Overall |
|-------|---|----|-----|----|---|----|-----|------|----|---|---------|
| V     |   |    |     |    |   |    |     |      |    |   |         |
| VI    |   |    |     |    |   |    |     |      |    |   |         |
| VII   |   |    |     |    |   |    |     |      |    |   |         |
| VIII  |   |    |     |    |   |    |     |      |    |   |         |
| IX    |   |    |     |    |   |    |     |      |    |   |         |
| X     |   |    |     |    |   |    |     |      |    |   |         |

doi:10.1371/journal.pone.0103222.t002

I ( $\beta = 0.48$ ,  $P = 0.217$ ), item IV ( $\beta = -0.40$ ,  $P = 0.391$ ), item VI ( $\beta = 0.06$ ,  $P = 0.882$ ), and item VII ( $\beta = 0.77$ ,  $P = 0.112$ ).

## Discussion

This comprehensive systematic review was conducted to investigate the prevalence of PACG in Asian, and to understand the reasons of estimate variability. The findings showed that for those of adult Asian populations, 0.75% were estimated to have PACG. This systematic review also quantified the variability in the prevalence of PACG for age, gender and ethnic group. The rate of PACG prevalence increased with age, approximately double per decade. PACG prevalence in women was approximately 1.5 times that in men. There was a strong variability of PACG prevalence rates by ethnic group.

It has been established that the prevalence of glaucoma varies significantly by region [1,9,12,52]. On the basis of the findings from this systematic review, there was also significant ethnic variation in the prevalence of PACG among five Asian regions. The highest prevalence rates of PACG were reported in Japan (1.19%) and China (1.10%), followed by Middle East (0.97%), South East Asia (0.66%), and India (0.46%). A recent systematic review found that the prevalence of PACG in those 40 years or more in European derived populations is 0.4% (95% CI 0.3% to 0.5%) [53]. Therefore, the prevalence of PACG in Asians, especially in East Asians and South East Asians, is higher than those in Europeans. However, the findings should be interpreted with caution, especially for the Japan, Middle East and South East Asia groups, because of the very wide confidence interval of prevalence rates, and the significantly large heterogeneity across included studies.

The pooled prevalence of PACG in five Asian ethnic group from the present review was inconsistent with the results reported in the previous reviews [1,13]. In the previous reviews [1,13], the prevalence of PACG was over-diagnosed in South East Asia, India, and China regions, and under-diagnosed in Middle East and Japan regions. Interpretation of the over- and under-diagnosis of PACG prevalence values is complicated by the inappropriate case definitions used in some studies diagnosing PACG, especially those based only on a narrow anterior chamber angle with raised IOP [13].

An appropriate case definition is the keystone of epidemiological research, and the ISGEO definition has commonly been accepted since it was published [1]. A consensus definition of an “occludable” angle in which the posterior (usually pigmented) trabecular meshwork is seen for less than 90° of angle circumference has come into common usage to indicate the anatomical predisposition to angle closure [1,54,55]. However, the definition of an “occludable” angle excluded around half of all participants who have primary peripheral anterior synechiae (PAS) [54]. Although a slightly more liberal threshold, 180 degrees of iridotrabecular contact (ITC), was used in many population studies, it is still likely to exclude many people who have primary PAS. Therefore, the most widely used epidemiological definition of an “occludable” angle, 180–270 degrees of ITC, is too stringent. The traditional view that primary angle closure becomes a significant possibility in the iridotrabecular angle of 20 degrees probably represents the most inclusive of approaches [54,55]. In addition, gonioscopy using visible light probably under-detects cases where ITC is occurring [55]. Although the results of this present review showed no association between the prevalence of PACG and the definition of occludable angle, in future, the definition of an “occludable angle” used in epidemiological studies of glaucoma still should be reconsidered.

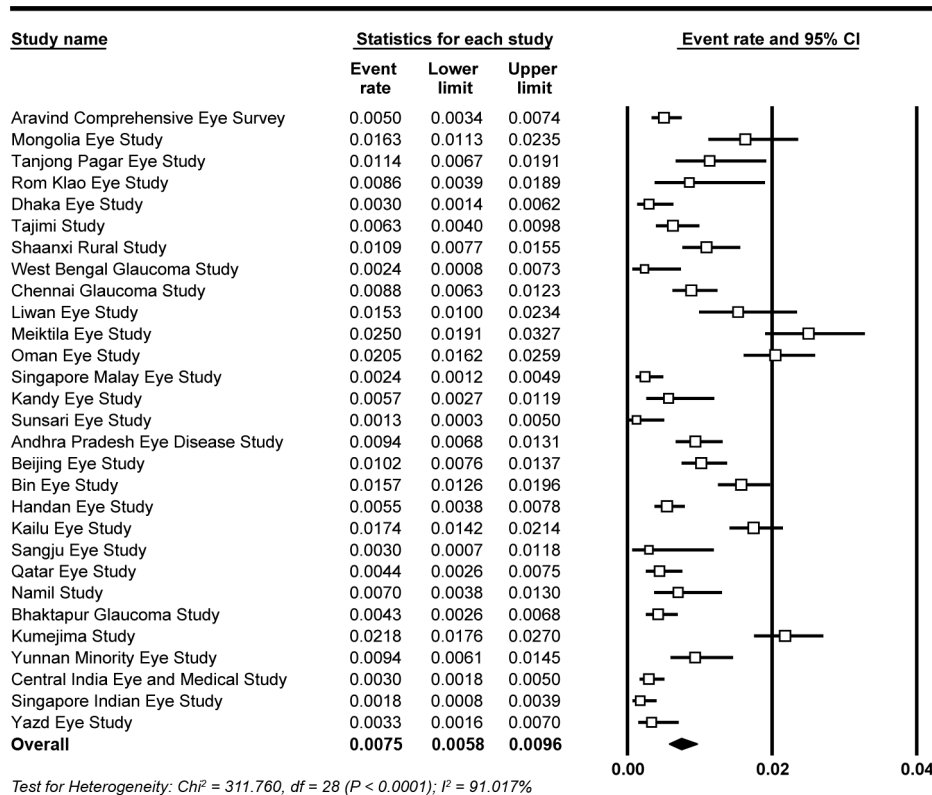

**Figure 2. The forest plot of the prevalence of primary angle closure glaucoma.**  
doi:10.1371/journal.pone.0103222.g002

There are several limitations of this systematic review should be discussed. First, similar to most systematic reviews, a potential limitation is the publication bias. We attempted to avoid the potential for publication bias by conducting an extensive search. However, the studies published in languages other than English probably was missed. Second, available studies were from only 14

countries. Thus, more population-based studies should be required to estimates the whole prevalence in Asian populations. Third, the diagnostic criteria for glaucoma and occludable angle also differed among studies. Although no association between the prevalence and case definitions was found, the expanding definition of an ‘occludable’ angle will allow for better consideration of this possibility through research and clinical practice [55].

Nevertheless, this systematic review provides a current evidence-based estimate of PACG prevalence in Asian populations. In the past, the number of glaucoma worldwide probably was misestimated. PACG affects approximately 0.75% adult Asian populations, and the prevalence rates vary greatly by ethnic region. The findings of this present systematic review provide benefit to estimate the burden of PACG in Asia.

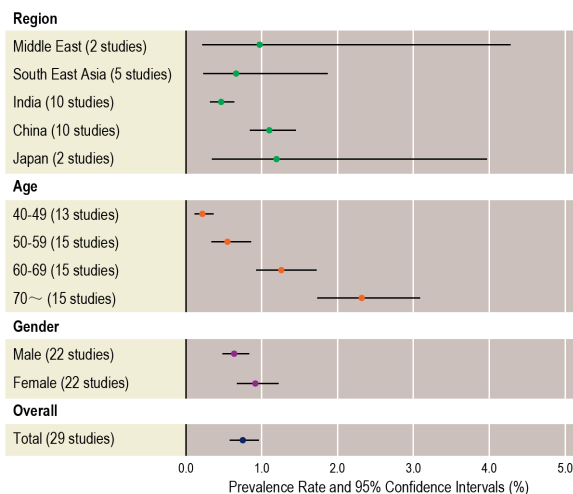

**Figure 3. Ethnicity-, age- and gender-specific pooled prevalence rates of primary angle closure glaucoma.**  
doi:10.1371/journal.pone.0103222.g003

**Supporting Information**

**Appendix S1 The excluded articles and the reason for exclusion.**  
(PDF)

**Checklist S1 PRISMA Checklist.**  
(DOC)

**Author Contributions**

Conceived and designed the experiments: JWC YZ YYZ RLW. Performed the experiments: JWC YZ YYZ RLW. Analyzed the data: JWC YZ YYZ. Contributed reagents/materials/analysis tools: JWC YZ YYZ. Contributed to the writing of the manuscript: JWC YZ YYZ RLW.



## References

- Quigley HA, Broman AT (2006) The number of people with glaucoma worldwide in 2010 and 2020. *Br J Ophthalmol* 90: 262–267.
- Wong TY, Loon SC, Saw SM (2006) The epidemiology of age related eye diseases in Asia. *Br J Ophthalmol* 90: 506–511.
- Zhou Q, Friedman DS, Lu H, Duan X, Liang Y, et al. (2007) The epidemiology of age-related eye diseases in Mainland China. *Ophthalmic Epidemiol* 14: 399–407.
- Foster PJ, Baasanhu J, Alsbirk PH, Munkhbayer D, Uranchimeg D, et al. (1996) Glaucoma in Mongolia. A population-based survey in Hövsögöl province, northern Mongolia. *Arch Ophthalmol* 114: 1235–1241.
- Shiose Y, Kitazawa Y, Tsukahara S, Akamatsu T, Mizokami K, et al. (1991) Epidemiology of glaucoma in Japan—a nationwide glaucoma survey. *Jpn J Ophthalmol* 35: 133–155.
- Hu CN (1989) An epidemiologic study of glaucoma in Shunyi County, Beijing. *Zhonghua Yan Ke Za Zhi* 25: 115–119.
- Dandona L, Dandona R, Mandal P, Srinivas M, John RK, et al. (2000) Angle-closure glaucoma in an urban population in southern India. The Andhra Pradesh eye disease study. *Ophthalmology* 107: 1710–1716.
- Foster PJ, Buhrmann R, Quigley HA, Johnson GJ (2002) The definition and classification of glaucoma in prevalence surveys. *Br J Ophthalmol* 86: 238–242.
- He M, Foster PJ, Johnson GJ, Khaw PT (2006) Angle-closure glaucoma in East Asian and European people. Different diseases? *Eye* 20: 3–12.
- Stroup DF, Berlin JA, Morton SC, Olkin I, Williamson GD, et al. (2000) Meta-analysis of observational studies in epidemiology: a proposal for reporting. Meta-analysis Of Observational Studies in Epidemiology (MOOSE) group. *JAMA* 283: 2008–2012.
- Moher D, Liberati A, Tetzlaff J, Altman DG; PRISMA Group (2009) Preferred reporting items for systematic reviews and meta-analyses: the PRISMA statement. *BMJ* 339: b2535.
- Rudnicka AR, Mt-Isa S, Owen CG, Cook DG, Ashby D (2006) Variations in primary open-angle glaucoma prevalence by age, gender, and race: a Bayesian meta-analysis. *Invest Ophthalmol Vis Sci* 47: 4254–4261.
- Cheng JW, Cheng SW, Ma XY, Cai JP, Li Y, et al. (2013) The prevalence of primary glaucoma in mainland China: a systematic review and meta-analysis. *J Glaucoma* 22: 301–306.
- Hoy D, Brooks P, Woolf A, Blyth F, March L, et al. (2012) Assessing risk of bias in prevalence studies: modification of an existing tool and evidence of interrater agreement. *J Clin Epidemiol* 65: 934–939.
- Hoy D, Bain C, Williams G, March L, Brooks P, et al. (2012) A systematic review of the global prevalence of low back pain. *Arthritis Rheum* 64: 2028–2037.
- von Elm E, Altman DG, Egger M, Pocock SJ, Gøtzsche PC, et al. (2007) The Strengthening of Reporting of Observational Studies in Epidemiology (STROBE) statement: guidelines for reporting observational studies. *PLoS Med* 4: e296
- Vandenbroucke JP, von Elm E, Altman DG, Gøtzsche PC, Mulrow CD, et al. (2007) Strengthening the Reporting of Observational Studies in Epidemiology (STROBE): explanation and elaboration. *PLoS Med* 4: e297.
- Higgins JPT, Green S (2011) *Cochrane Handbook for Systematic Reviews of Interventions* Version 5.1.0. The Cochrane Collaboration. Available from [www.cochrane-handbook.org](http://www.cochrane-handbook.org). Accessed 11 July 2011.
- Higgins JP, Thompson SG (2002) Quantifying heterogeneity in a meta-analysis. *Stat Med* 21: 1539–1558.
- Higgins JP, Thompson SG, Deeks JJ, Altman DG (2003) Measuring inconsistency in meta-analyses. *BMJ* 327: 557–560.
- DerSimonian R, Laird N (1986) Meta-analysis in clinical trials. *Control Clin Trials* 7: 177–188.
- Mantel N, Haenszel W (1959) Statistical aspects of the analysis of data from retrospective studies of disease. *J Natl Cancer Inst* 22: 719–748.
- Ramakrishnan R, Nirmalan PK, Krishnadas R, Thulasiraj RD, Tielsch JM, et al. (2003) Glaucoma in a rural population of southern India: the Aravind comprehensive eye survey. *Ophthalmology* 110: 1484–1490.
- Devereux JG, Foster PJ, Baasanhu J, Uranchimeg D, Lee PS, et al. (2000) Anterior chamber depth measurement as a screening tool for primary angle-closure glaucoma in an East Asian population. *Arch Ophthalmol* 118: 257–263.
- Foster PJ, Oen FT, Machin D, Ng TP, Devereux JG, et al. (2000) The prevalence of glaucoma in Chinese residents of Singapore: a cross-sectional population survey of the Tanjong Pagar district. *Arch Ophthalmol* 118: 1105–1111.
- Bourne RR, Sukudom P, Foster PJ, Tantisevi V, Jitapunkul S, et al. (2003) Prevalence of glaucoma in Thailand: a population based survey in Rom Klao District, Bangkok. *Br J Ophthalmol* 87: 1069–1074.
- Rahman MM, Rahman N, Foster PJ, Haque Z, Zaman AU, et al. (2004) The prevalence of glaucoma in Bangladesh: a population based survey in Dhaka division. *Br J Ophthalmol* 88: 1493–1497.
- Yamamoto T, Iwase A, Araie M, Suzuki Y, Abe H, et al. (2005) The Tajimi Study report 2: prevalence of primary angle closure and secondary glaucoma in a Japanese population. *Ophthalmology* 112: 1661–1669.
- Bai ZL, Ren BC, Yan JG, He Y, Chen L, et al. (2005) Epidemiology of primary angle-closure glaucoma in a rural population in Shaanxi Province of China. *Guo Ji Yan Ke Za Zhi* 5: 872–880.
- Raychaudhuri A, Lahiri SK, Bandyopadhyay M, Foster PJ, Reeves BC, et al. (2005) A population based survey of the prevalence and types of glaucoma in rural West Bengal: the West Bengal Glaucoma Study. *Br J Ophthalmol* 89: 1559–1564.
- Vijaya L, George R, Arvind H, Baskaran M, Ve Ramesh S, et al. (2006) Prevalence of primary angle-closure disease in an urban south Indian population and comparison with a rural population. The Chennai Glaucoma Study. *Ophthalmology* 115: 655–660.e1.
- He M, Foster PJ, Ge J, Huang W, Zheng Y, et al. (2006) Prevalence and clinical characteristics of glaucoma in adult Chinese: a population-based study in Liwan District, Guangzhou. *Invest Ophthalmol Vis Sci* 47: 2782–2788.
- Casson RJ, Newland HS, Muecke J, McGovern S, Abraham L, et al. (2007) Prevalence of glaucoma in rural Myanmar: the Meiktila Eye Study. *Br J Ophthalmol* 91: 710–714.
- Khandekar R, Jaffer MA, Al Raisi A, Zutshi R, Mahabaleswar M, et al. (2008) Oman Eye Study 2005: prevalence and determinants of glaucoma. *East Mediterr Health J* 14: 1349–1359.
- Shen SY, Wong TY, Foster PJ, Loo JL, Rosman M, et al. (2008) The prevalence and types of glaucoma in Malay people: the Singapore Malay eye study. *Invest Ophthalmol Vis Sci* 49: 3846–3851.
- Casson RJ, Baker M, Edussuriya K, Senaratne T, Selva D, et al. (2009) Prevalence and determinants of angle closure in central Sri Lanka: the Kandy Eye Study. *Ophthalmology* 116: 1444–1448.
- Sah RP, Badhu BP, Pokharel PK, Thakur SK, Das H, et al. (2007) Prevalence of glaucoma in Sunsari district of eastern Nepal. *Kathmandu Univ Med J* 5: 343–348.
- Senthil S, Garudadri C, Khanna RC, Sannapaneni K (2010) Angle closure in the Andhra Pradesh Eye Disease Study. *Ophthalmology* 117: 1729–1735.
- Wang YX, Xu L, Yang H, Jonas JB (2010) Prevalence of glaucoma in North China: the Beijing Eye Study. *Am J Ophthalmol* 150: 917–924.
- Qu W, Li Y, Song W, Zhou X, Kang Y, et al. (2011) Prevalence and risk factors for angle-closure disease in a rural Northeast China population: a population-based survey in Bin County, Harbin. *Acta Ophthalmol* 89: e515–520.
- Liang Y, Friedman DS, Zhou Q, Yang XH, Sun LP, et al. (2011) Prevalence and characteristics of primary angle-closure diseases in a rural adult Chinese population: the Handan Eye Study. *Invest Ophthalmol Vis Sci* 52: 8672–8679.
- Song W, Shan L, Cheng F, Fan P, Zhang L, et al. (2011) Prevalence of glaucoma in a rural northern China adult population: a population-based survey in kailu county, inner mongolia. *Ophthalmology* 118: 1982–1988.
- Kim JH, Kang SY, Kim NR, Lee ES, Hong S, et al. (2011) Prevalence and characteristics of glaucoma among Korean adults. *Korean J Ophthalmol* 25: 110–115.
- Al-Mansouri FA, Kanaan A, Gamra H, Khandekar R, Hashim SP, et al. (2011) Prevalence and determinants of glaucoma in citizens of Qatar aged 40 years or older: a community-based survey. *Middle East Afr J Ophthalmol* 2011;18: 141–9.
- Kim YY, Lee JH, Ahn MD, Kim CY; Namil Study Group, Korean Glaucoma Society. (2012) Angle closure in the Namil study in central South Korea. *Arch Ophthalmol* 130: 1177–1183.
- Thapa SS, Paudyal I, Khanal S, Twyana SN, Paudyal G, et al. (2012) A population-based survey of the prevalence and types of glaucoma in Nepal: the Bhaktapur Glaucoma Study. *Ophthalmology* 119: 759–764.
- Sawaguchi S, Sakai H, Iwase A, Yamamoto T, Abe H, et al. (2012) Prevalence of primary angle closure and primary angle-closure glaucoma in a southwestern rural population of Japan: the Kumejima Study. *Ophthalmology* 119: 1134–1142.
- Zhong H, Li J, Li C, Wei T, Cha X, et al. (2012) The prevalence of glaucoma in adult rural Chinese populations of the Bai nationality in Dali: the Yunnan Minority Eye Study. *Invest Ophthalmol Vis Sci* 53: 3221–3225.
- Nangia V, Jonas JB, Matin A, Bhojwani K, Sinha A, et al. (2013) Prevalence and associated factors of glaucoma in rural central India. The Central India Eye and Medical Study. *PLoS One* 8: e76434.
- Narayanaswamy A, Baskaran M, Zheng Y, Lavanya R, Wu R, et al. (2013) The prevalence and types of glaucoma in an urban Indian population: the Singapore Indian Eye Study. *Invest Ophthalmol Vis Sci* 54: 4621–4627.
- Pakravan M, Yazdani S, Javadi MA, Amini H, Behroozi Z, et al. (2013) A Population-based Survey of the Prevalence and Types of Glaucoma in Central Iran: The Yazd Eye Study. *Ophthalmology* 120: 1977–1984.
- Cassard SD, Quigley HA, Gower EW, Friedman DS, Ramulu PY, et al. (2012) Regional variations and trends in the prevalence of diagnosed glaucoma in the Medicare population. *Ophthalmology* 119: 1342–1351.
- Day AC, Baio G, Gazzard G, Bunce C, Azuara-Blanco A, et al. (2012) The prevalence of primary angle closure glaucoma in European derived populations: a systematic review. *Br J Ophthalmol* 96: 1162–1167.
- Foster PJ, Aung T, Nolan WP, Machin D, Baasanhu J, et al. (2004) Defining "occludable" angles in population surveys: drainage angle width, peripheral anterior synechiae, and glaucomatous optic neuropathy in east Asian people. *Br J Ophthalmol* 88: 486–490.
- Foster P, He M, Liebmann J (2006) Epidemiology, classification and mechanism. In: Weinreb RN, Friedman DS, editors. *Angle Closure and Angle-Closure Glaucoma: Reports and Consensus Statements of the 3rd Global AIGS Consensus Meeting on Angle Closure Glaucoma*. The Netherlands: Kugler Publications. pp.1–20.
